# Supplementary material for: A semi-crystalline polymer binder with enhanced electrical conductivity and strong underwater adhesion in aqueous sodium–air batteries
Source: Royal Society of Chemistry journal article supplement (doi:10.1039/d5ee01350j), 2025-01-01
Supplement: d5ee01350j1.pdf [file d5ee01350j1.pdf]

## Supplementary Information

### **A semi-crystalline polymer binder with enhanced electrical conductivity and strong underwater adhesion in aqueous sodium-air batteries**

*Jeonguk Hwang<sup>a</sup>, Min Hoon Myung<sup>a</sup>, Jee Ho Ha<sup>a</sup>, Seungwoo Choi<sup>a</sup>, Soon-Jae Jung<sup>a</sup>, Seunghyun Lee<sup>a</sup>, Jinwoo Park<sup>a</sup>, Young-Ryul Kim<sup>a</sup>, Hyo Jin<sup>a</sup>, Nyung Joo Kong<sup>a</sup>, Youngsik Kim<sup>a</sup>, Hyun-Wook Lee<sup>a</sup>, Hyunhyub Ko<sup>a</sup>, Tae Joo Shin<sup>b</sup>, Seok Ju Kang<sup>a</sup>, Myung-Jin Baek<sup>a\*</sup>, and Dong Woog Lee<sup>a\*</sup>*

<sup>a</sup>School of Energy & Chemical Engineering, Ulsan National Institute of Science and Technology (UNIST), Ulsan, 44919, Republic of Korea

<sup>b</sup>Graduate School of Semiconductor Materials and Devices Engineering, Ulsan National Institute of Science and Technology (UNIST), Ulsan, 44919, Republic of Korea

## Contents

|                                                                                                      |    |
|------------------------------------------------------------------------------------------------------|----|
| <b>Supplementary Note</b> .....                                                                      | 4  |
| Synthesis of dopamine- <i>m</i> -acrylamide (DMA) .....                                              | 4  |
| Synthesis of 9-(acryloyloxy)butyl anthracene-9-carboxylate (At-acrylate) .....                       | 4  |
|                                                                                                      |    |
| Synthesis of poly(DMA-co-PEG acrylate-co-PEG diacrylate) (DPA64) <i>via</i> RAFT polymerization ---- | 5  |
|                                                                                                      |    |
| Scheme S1. Synthetic routes of monomers and polymers .....                                           | 6  |
|                                                                                                      |    |
| Table S1. Formulation of polymers .....                                                              | 7  |
|                                                                                                      |    |
| Table S2. Average overpotential of polymer binders up to 100 cycles .....                            | 19 |
|                                                                                                      |    |
| Table S3. Simulated results for the elements of equivalent circuit .....                             | 23 |
|                                                                                                      |    |
| <b>Supplementary Figures</b> .....                                                                   | 8  |
|                                                                                                      |    |
| Fig. S1. <sup>1</sup> H- and <sup>13</sup> C-NMR spectra of DMA .....                                | 8  |
|                                                                                                      |    |
| Fig. S2. <sup>1</sup> H- and <sup>13</sup> C-NMR spectra of At-acrylate .....                        | 9  |
|                                                                                                      |    |
| Fig. S3. GC-mass analysis of DMA and At-acrylate .....                                               | 10 |
|                                                                                                      |    |
| Fig. S4. <sup>1</sup> H-NMR spectra of DPA64 and DPTA631 .....                                       |    |

11

Fig. S5. Differential scanning calorimetry (DSC) of DPA64 and DPTA631 -----

12

Fig. S6. Water contact angle (WCA) of polymers -----

13

Fig. S7. Galvanostatic charge/discharge profiles of DPA622 for 50 cycles -----

14

Fig. S8. Electrical conductivity of Anthracene-incorporated binders -----

15

Fig. S9. Electrochemical performance of SABs by using a bare carbon -----

16

Fig. S10. Voltage gap of charge/discharge cycles in the polymer binders -----

17

Fig. S11. Galvanostatic charge-discharge profiles of DPA64 and DPTA631 for 300 cycles -----18

Fig. S12. Average and standard deviation of OER and ORR performance of SABs -----

21

Fig. S13. Power density of polymer binders at 30<sup>th</sup> cycle -----

22

Fig. S14. EIS spectra and equivalent circuit of SABs after charge/discharge 30 cycles -----

24

Fig. S15. Photograph and POM images of the DPA64 coated glass -----

25

|                                                                                     |    |
|-------------------------------------------------------------------------------------|----|
| Fig. S16. XRD of polymer binders .....                                              | 26 |
| Fig. S17. Normal TEM image of DPTA631 and various semi-crystalline domains .....    | 27 |
| Fig. S18. Coating thickness of polymer binders .....                                | 28 |
| Fig. S19. CO <sub>2</sub> evolution rates for bare carbon, DPA64, and DPTA631 ..... | 29 |
| Fig. S20. Solubility test of binders in EtOH .....                                  | 30 |
| <b>Supplementary Reference</b> .....                                                | 31 |

## Supplementary Note

Dibenzyl trithiocarbonate (reversible addition-fragmentation chain transfer polymerization material (RAFT))<sup>[1]</sup> was synthesized following previously reported methods.

### Synthesis of dopamine-*m*-acrylamide (DMA)

To a dry 250 ml two-neck flask, 8.00 g (42.11 mmol) of dopamine hydrochloride was dissolved in 70 ml of degassed methanol. The mixture was bubbled with Ar gas for 5 min, and 17.61 ml trimethylamine (TEA) was added. When dopamine hydrochloride was fully dissolved, the solution was cooled in an ice bath. A solution of methacrylic anhydride (7.46 g, 48.42 mmol) in 5 ml THF was added through dropwise over 10 min. The reaction mixture was stirred at room temperature for 3 h. Next, methanol was removed under reduced pressure. The crude product was washed 2 M HCl solution, followed by a brine wash, and extracted with ethyl acetate (AcOEt) two times. The combined organic phase was washed with water and dried with MgSO<sub>4</sub>. The solution was concentrated under lower pressure. For purification, the white-off solid was precipitated in 150 ml of hexane and AcOEt (9:1 volume ratio). The final product was dried in a vacuum at 12 h. (Y = 70%).

<sup>1</sup>H NMR (ppm, DMF-d<sub>7</sub>, 400 MHz,  $\delta$ ): 8.83 (s, 2H), 7.95 (s, 1H), 6.72 (m, 2H), 6.52 (dd, 1H), 5.73 (s, 1H), 5.33 (t, 1H), 3.38 (q, 2H), 2.66 (t, 2H, 8Hz), 1.92 (s, 3Hz); <sup>13</sup>C NMR (ppm, DMF-d<sub>7</sub>, 100 MHz,  $\delta$ ): 168.62, 146.66, 145.11, 141.84, 131.97, 120.55, 119.34, 117.11, 116.44, 42.44, 36.07, 19.30.

### Synthesis of 9-(acryloyloxy)butyl anthracene-9-carboxylate (At-acrylate)

9-Anthracenecarboxylic acid (4.65 g) was dissolved in degassed dichloromethane (DCM). Oxalyl chloride (2.34 mL) was added dropwise to the reaction mixture and 350 mg of DMF was used as a catalyst. The mixture was then sealed and stirred for 4 h at room temperature under positive pressure. The solvent and unreacted oxalyl chloride were removed via evaporation. DCM (25 mL), 7.38 mL (7.69 g) of 4-hydroxybutyl acrylate, and 17.25 mL (12.52 g) of TEA were added to the resulting mixture. The

resulting mixture was stirred for 1 h at room temperature and degassed for 10 min. After stirring, the solution was washed with equal volumes of 2 M HCl twice, 2 M NaOH four times, brine once, and DI water twice, and then dried over MgSO<sub>4</sub>. The solution was concentrated under reduced pressure and short column chromatography (hexane : AcOEt = 5 : 1). Final yield of products was 65%.

<sup>1</sup>H NMR (ppm, DMF-d<sub>7</sub>, 400 MHz, δ): 8.82 (s, 1H), 8.21 (d, 2H, 8Hz), 8.10 (d, 2H, 8Hz), 7.65 (m, 4H), 6.35 (dd, 1H), 6.22 (dd, 1H), 5.94 (dd, 1H), 4.74 (t, 2H, 8Hz), 4.26 (t, 2H, 8Hz), 2.00 (m, 2H), 1.89 (m, 2H); <sup>13</sup>C NMR (ppm, DMF-d<sub>7</sub>, 100 MHz, δ): 170.20, 166.80, 132.13, 131.85, 130.36, 129.89, 129.72, 129.52, 129.09, 128.45, 126.90, 125.88, 66.53, 64.98, 26.46, 26.42.

#### **Synthesis of poly(DMA-co-PEG acrylate-co-PEG diacrylate) (DPA64) *via* RAFT polymerization**

Copolymerization of DMA, PEG-acrylate ( $M_w = 480 \text{ g mol}^{-1}$ ), and PEG-diacrylate ( $M_w = 550 \text{ g mol}^{-1}$ ) was performed in DMF. DMA (132.6 mg, 0.6 mmol) was dissolved in 400  $\mu\text{L}$  of DMF and added into a polymerization ampoule. PEG-acrylate (192.6 mg, 0.4 mmol), and PEG-diacrylate (11.5 mg, 0.02 mmol) were added to the ampoule. 0.5% mmol AIBN and RAFT agent (dibenzyl trithiocarbonate) were dissolved in DMF (0.1 mg  $\mu\text{L}^{-1}$ ) then added into the polymerization ampoule. After removing oxygen by three freeze-thaw cycles, polymerization was carried out at 70 °C for 24 h. After completion, DPA64 was precipitated twice from diethyl ether: hexane (2:1 volume ratio), and ~320 mg of a colorless, highly viscous polymer was obtained. The other polymers were polymerized under similar conditions by controlling the type and ratio of the monomers. (Table S1)

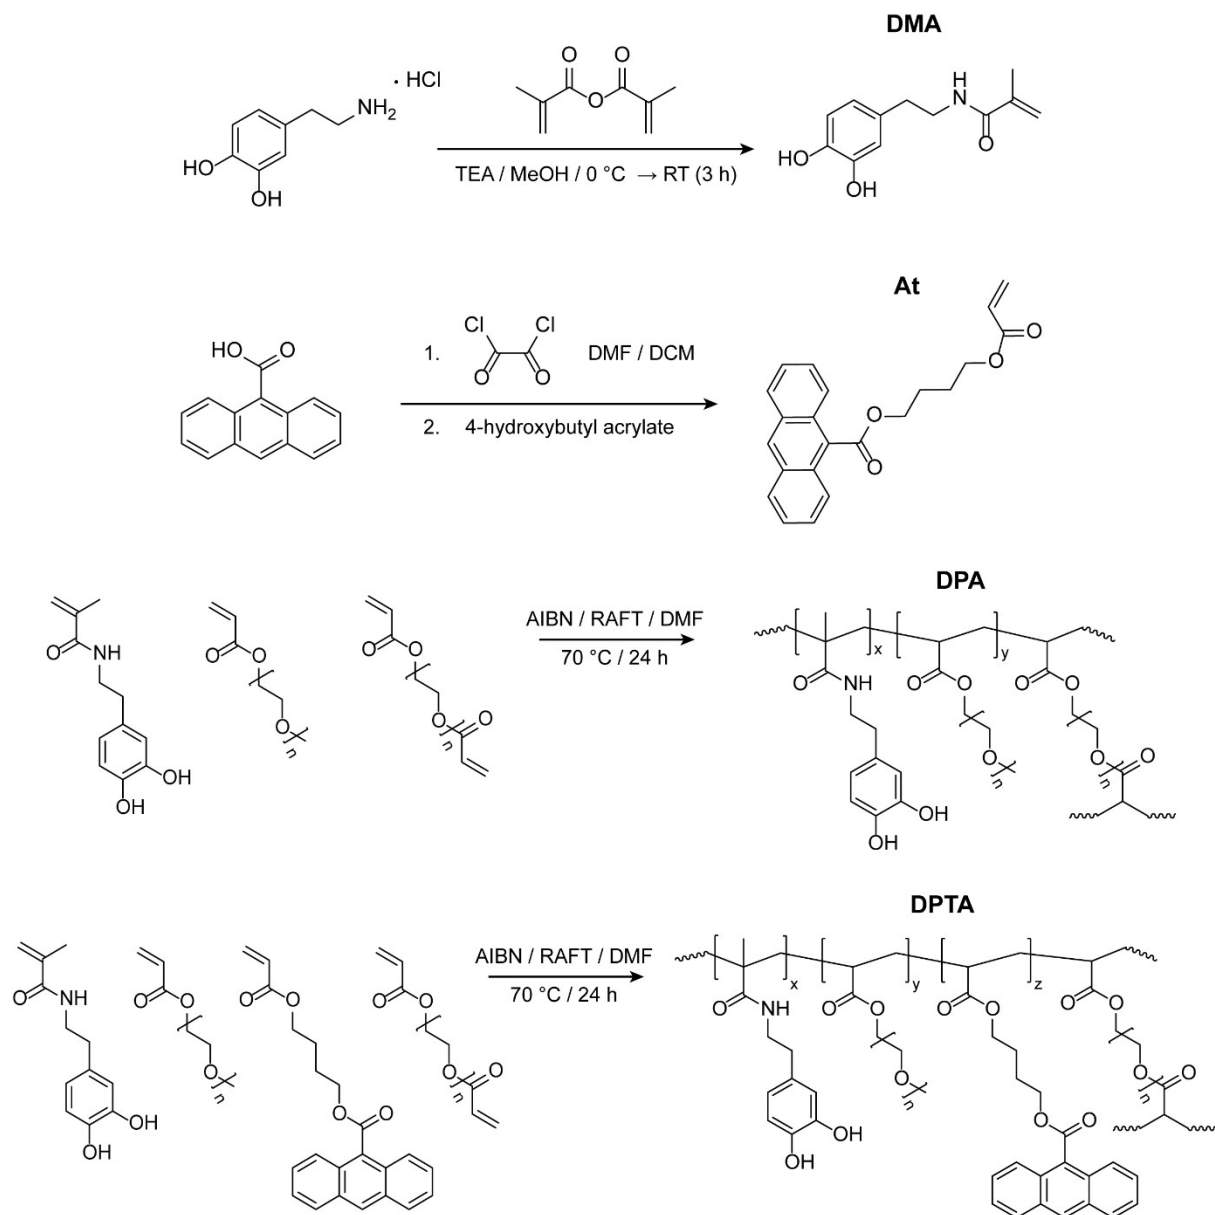

**Scheme S1.** Synthetic routes of monomers and polymers.

**Table S1.** Formulation of polymers.

|                | <b>DMA<br/>(mg)</b> | <b>At<br/>(mg)</b> | <b>PEG-acrylate<br/>(mg)</b> | <b>PEG-diacrylate<br/>(mg)</b> | <b>AIBN<br/>(mg)</b> | <b>RAFT<br/>(mg)</b> |
|----------------|---------------------|--------------------|------------------------------|--------------------------------|----------------------|----------------------|
| <b>DPA64</b>   | 132.6               | -                  | 192.6                        | 11.5                           | 0.82                 | 1.45                 |
| <b>DPTA631</b> | 132.6               | 34.84              | 144.0                        |                                |                      |                      |



**Fig. S1.** (a)  $^1\text{H}$ - and (b)  $^{13}\text{C}$ -NMR spectra of DMA.

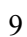

**Fig. S1.** (a)  $^1\text{H}$ - and (b)  $^{13}\text{C}$ -NMR spectra of DMA.

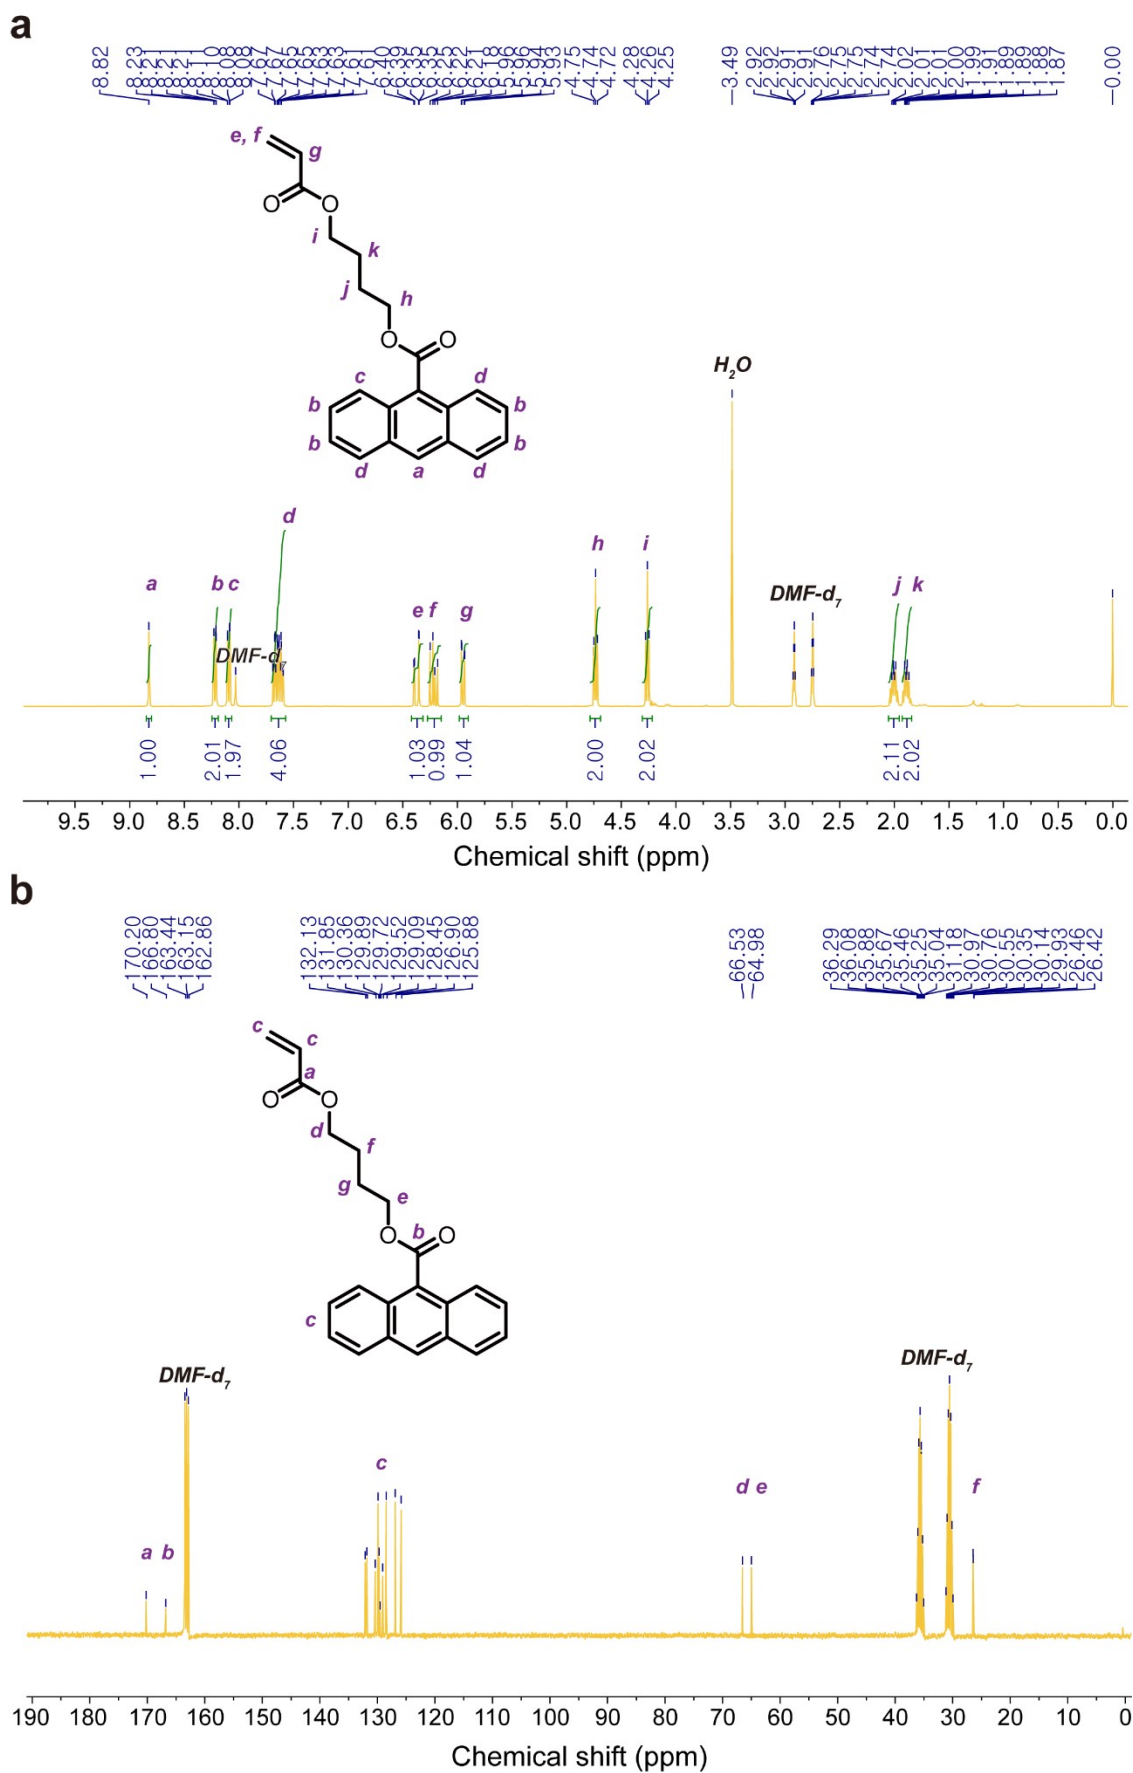

**Fig. S2.** (a)  $^1\text{H}$ - and (b)  $^{13}\text{C}$ -NMR spectra of At-acrylate.

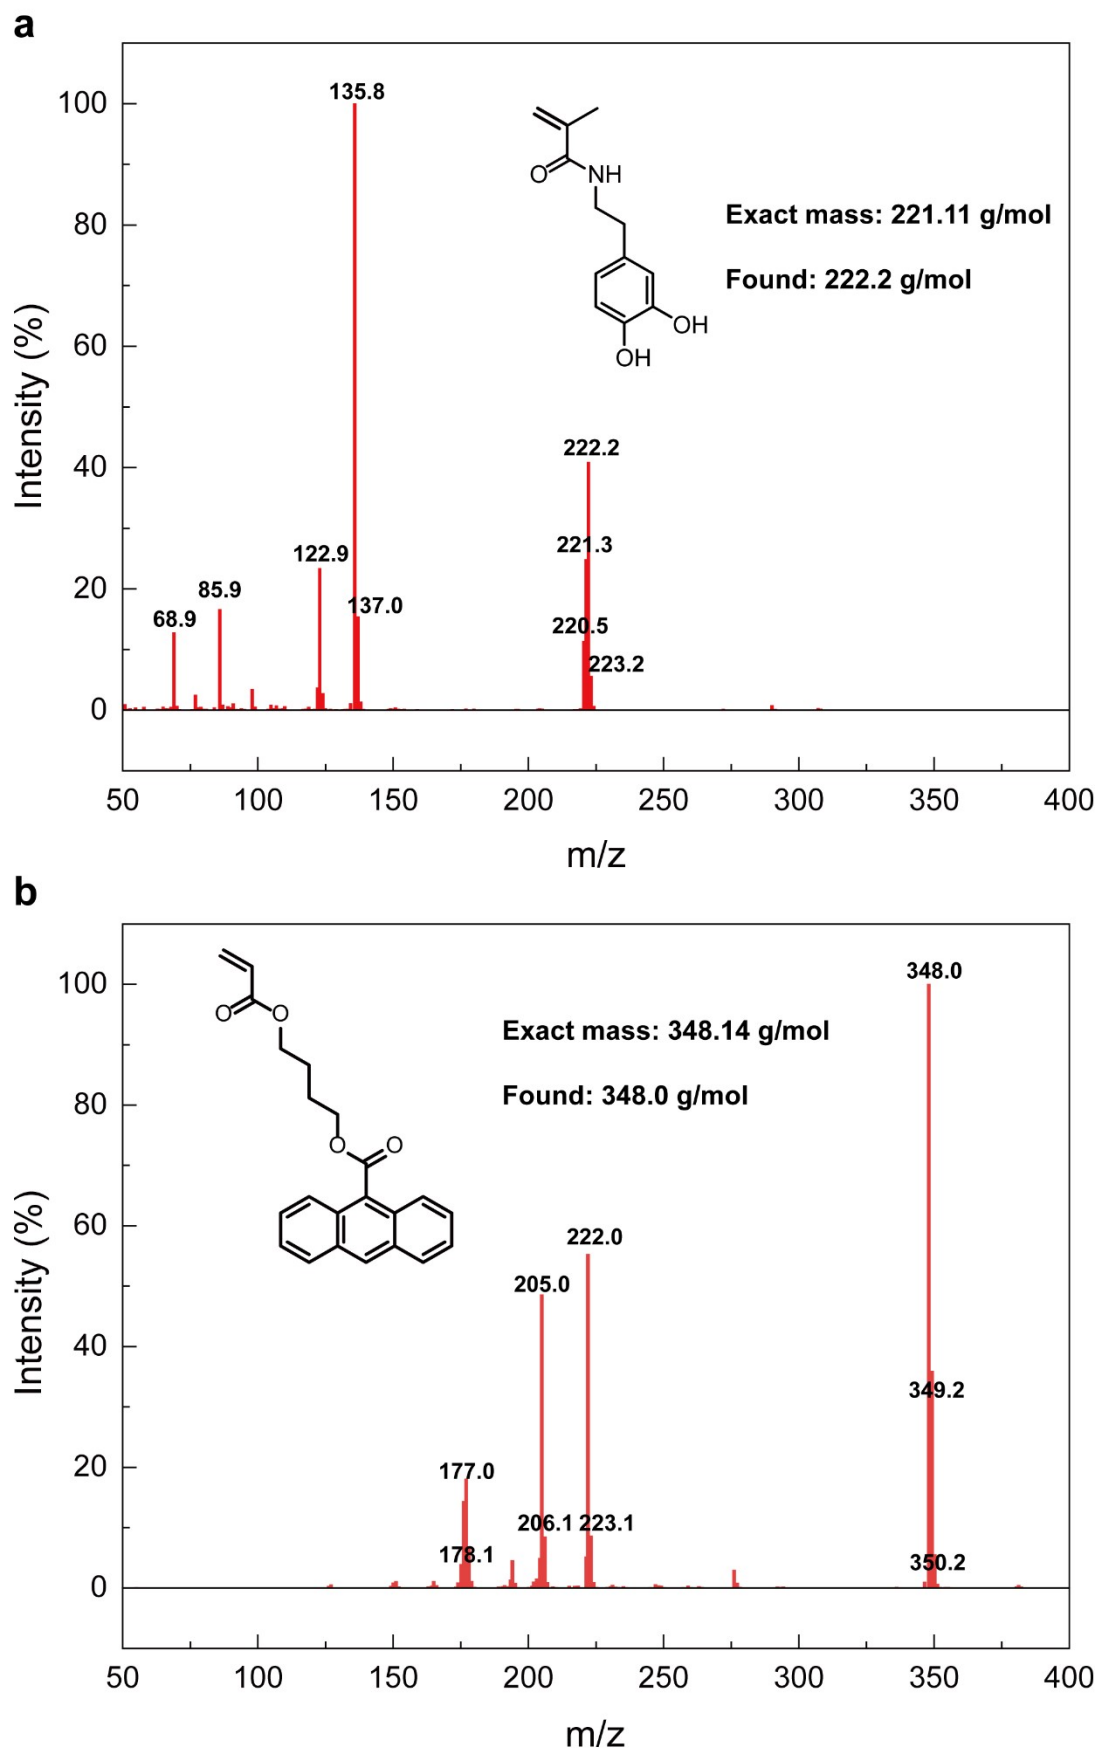

**Fig. S3.** GC-mass analysis of (a) DMA and (b) At-acrylate.



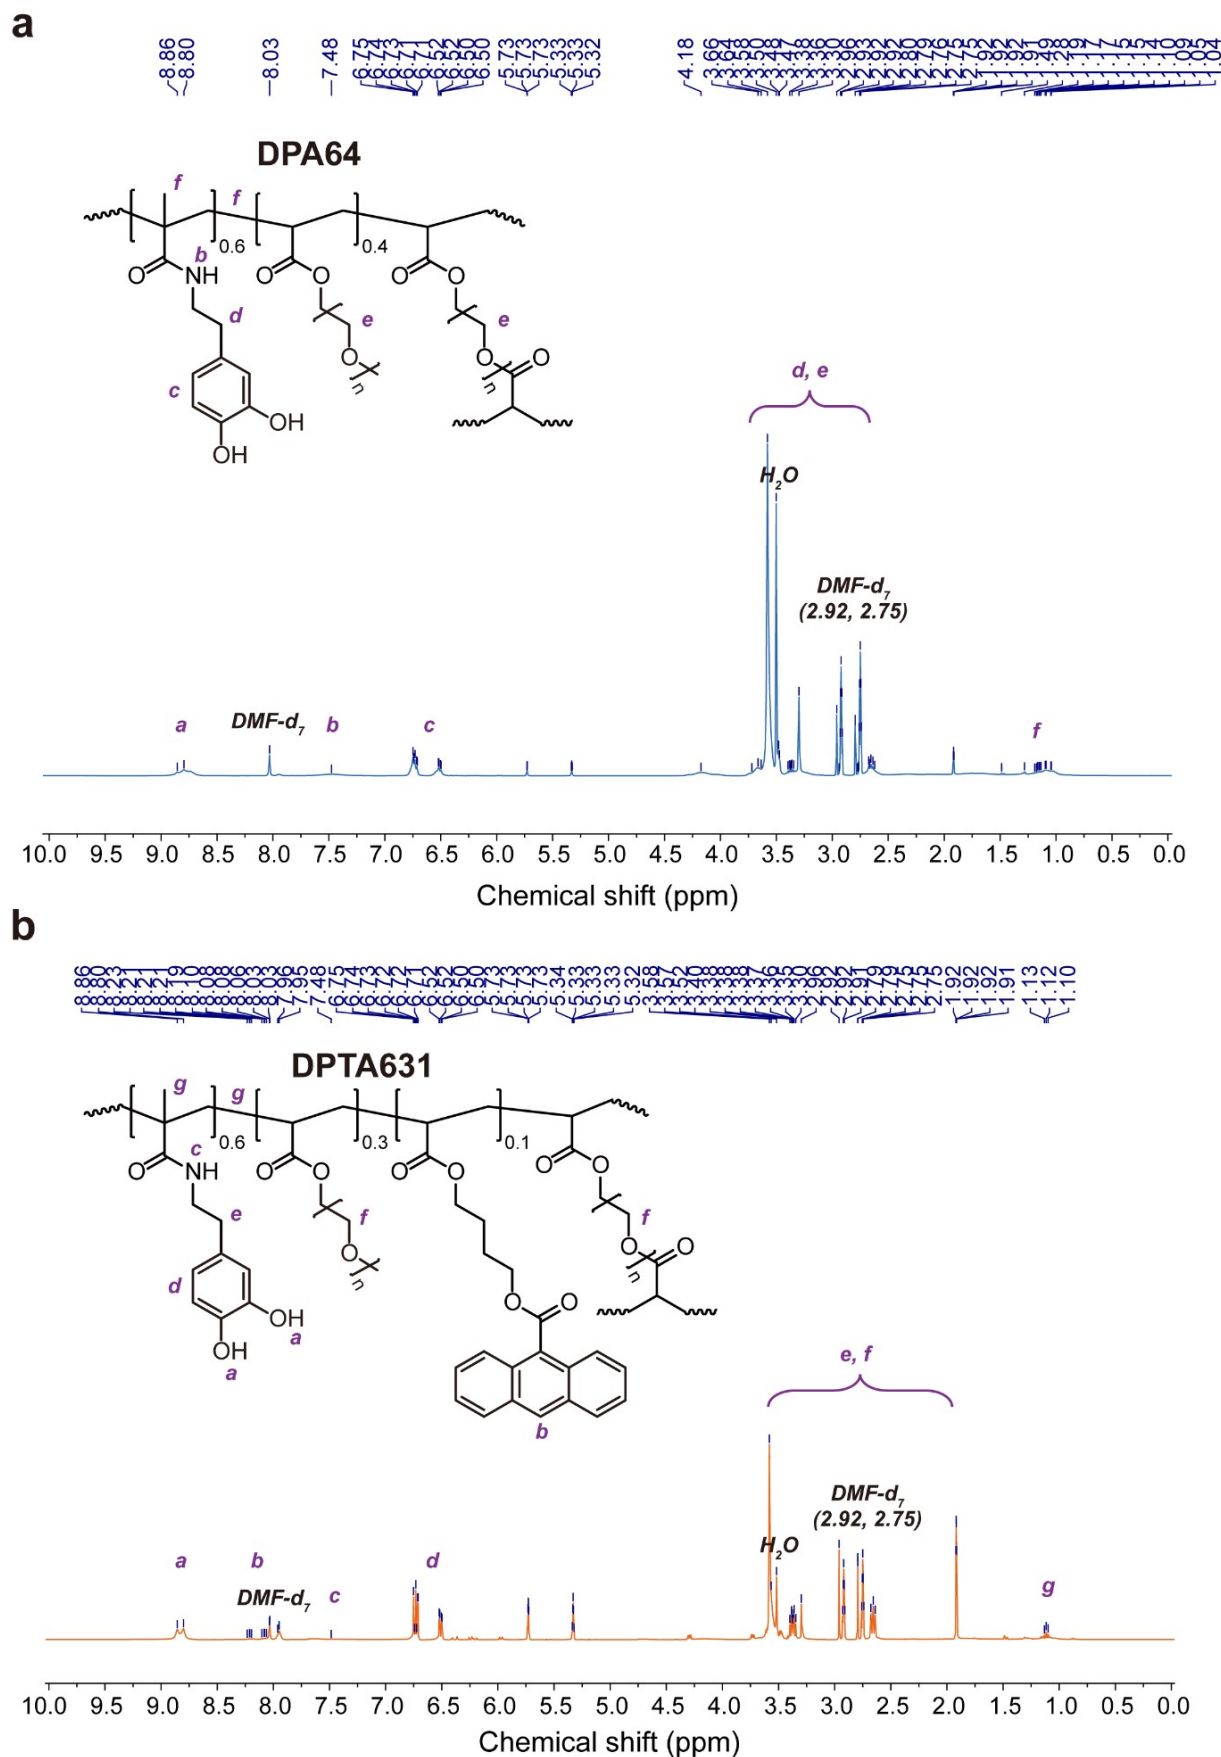

**Fig. S4.**  $^1\text{H}$ -NMR spectra of (a) DPA64 and (b) DPTA631.

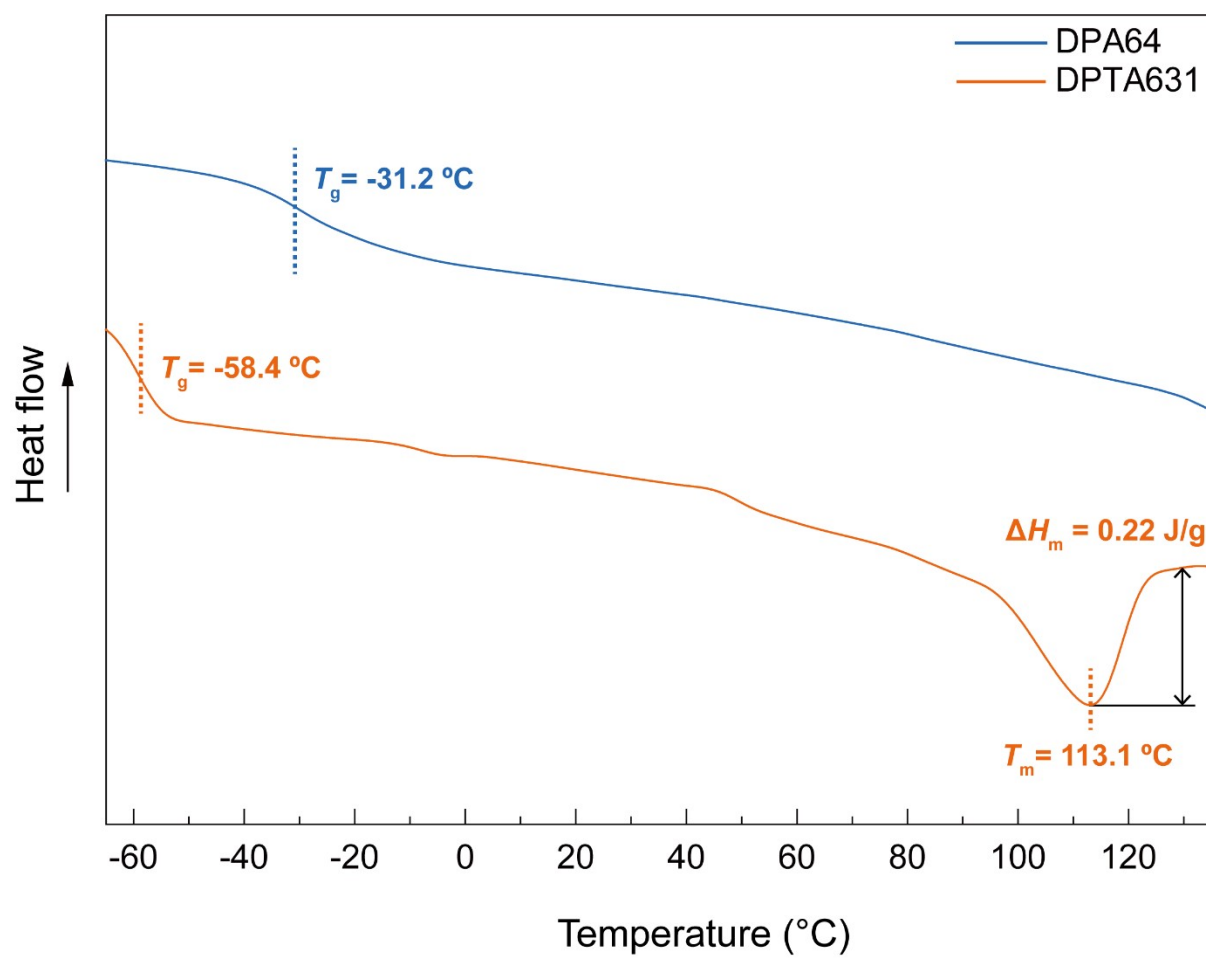

**Fig. S5.** Differential scanning calorimetry (DSC) of DPA64 and DPTA631.

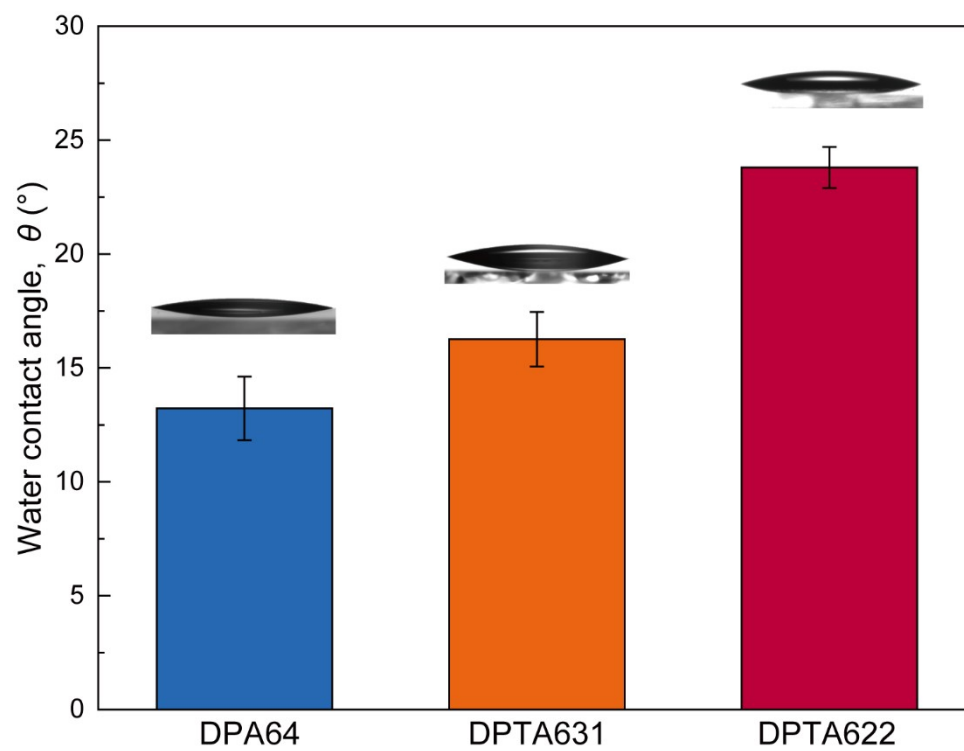

**Fig. S6.** Water contact angle (WCA) of polymers.

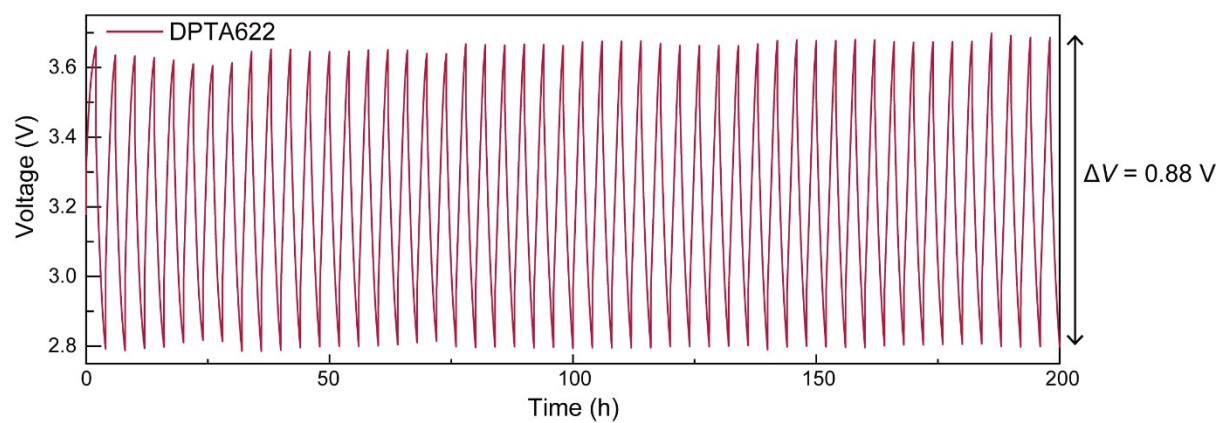

**Fig. S7.** Galvanostatic charge/discharge profiles of DPA622 for 50 cycles.



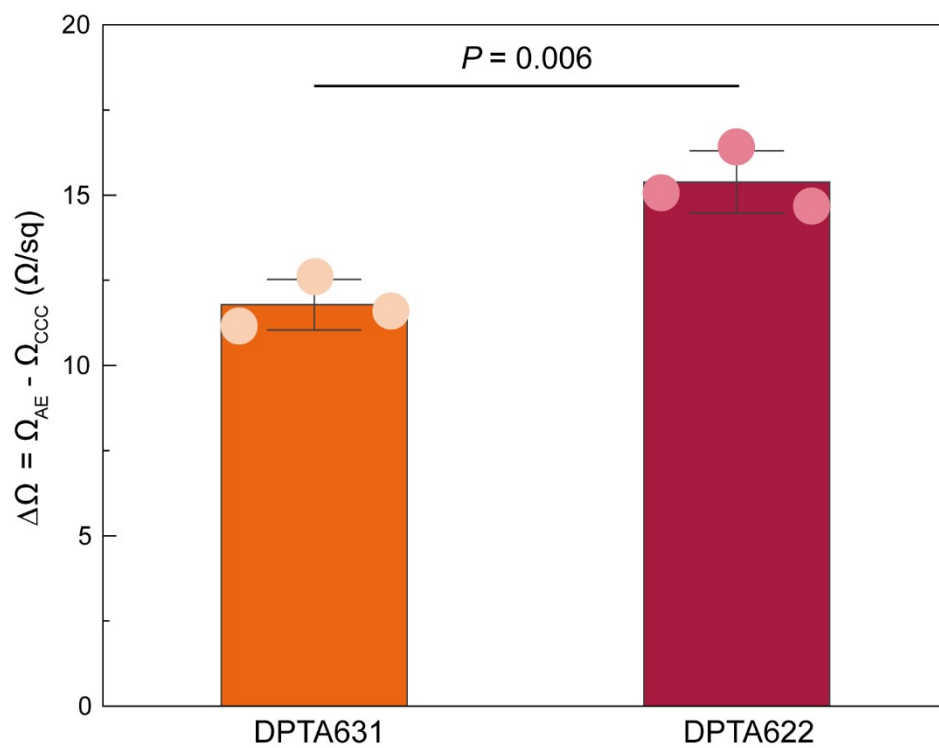

**Fig. S8.** Electrical conductivity of Anthracene-incorporated binders. Values indicate mean  $\pm$  s.d. ( $n = 3$  independent samples). Statistical significance and  $P$  values were evaluated by a two-sided  $t$ -test.

**a Galvanostatic charge-discharge curve**

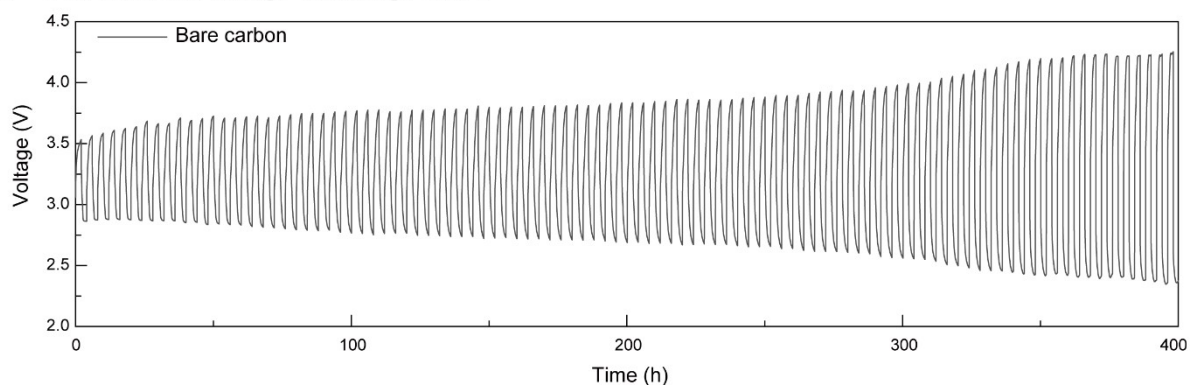

**b Overpotential**

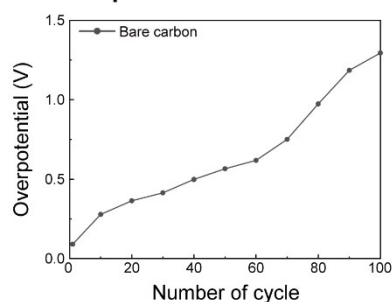

**c OER performance**

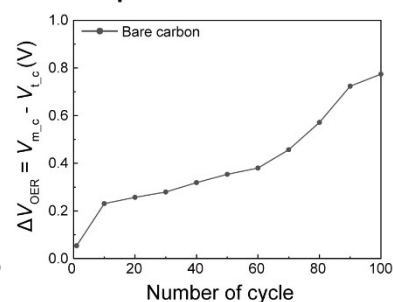

**d ORR performance**

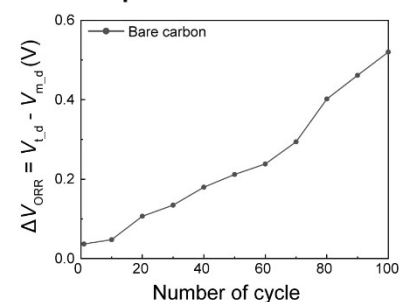

**e Energy efficiency**

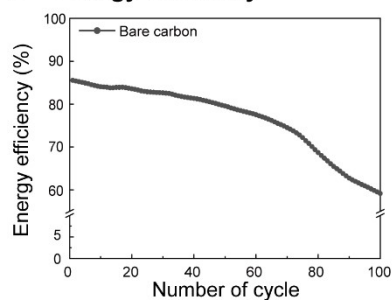

**f Polarization and power curve**

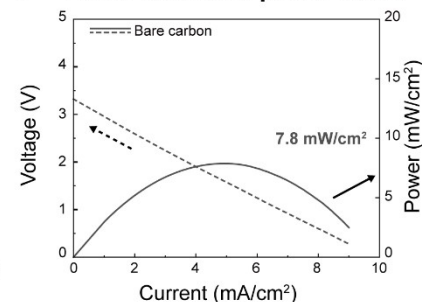

**g EIS spectra**

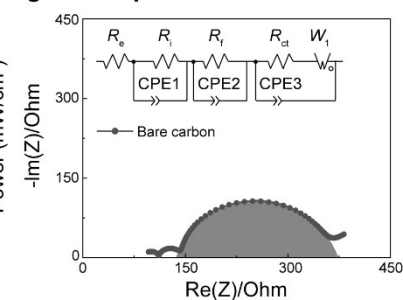

**Fig. S9.** Electrochemical performance of SABs by using a bare carbon current collector without binder. (a) Galvanostatic charge/discharge profiles, (b) overpotential, (c) OER and (d) ORR performance, (e) energy efficiency, (f) polarization curves and power density, and (g) Electrochemical impedance spectroscopy (EIS) spectrum.

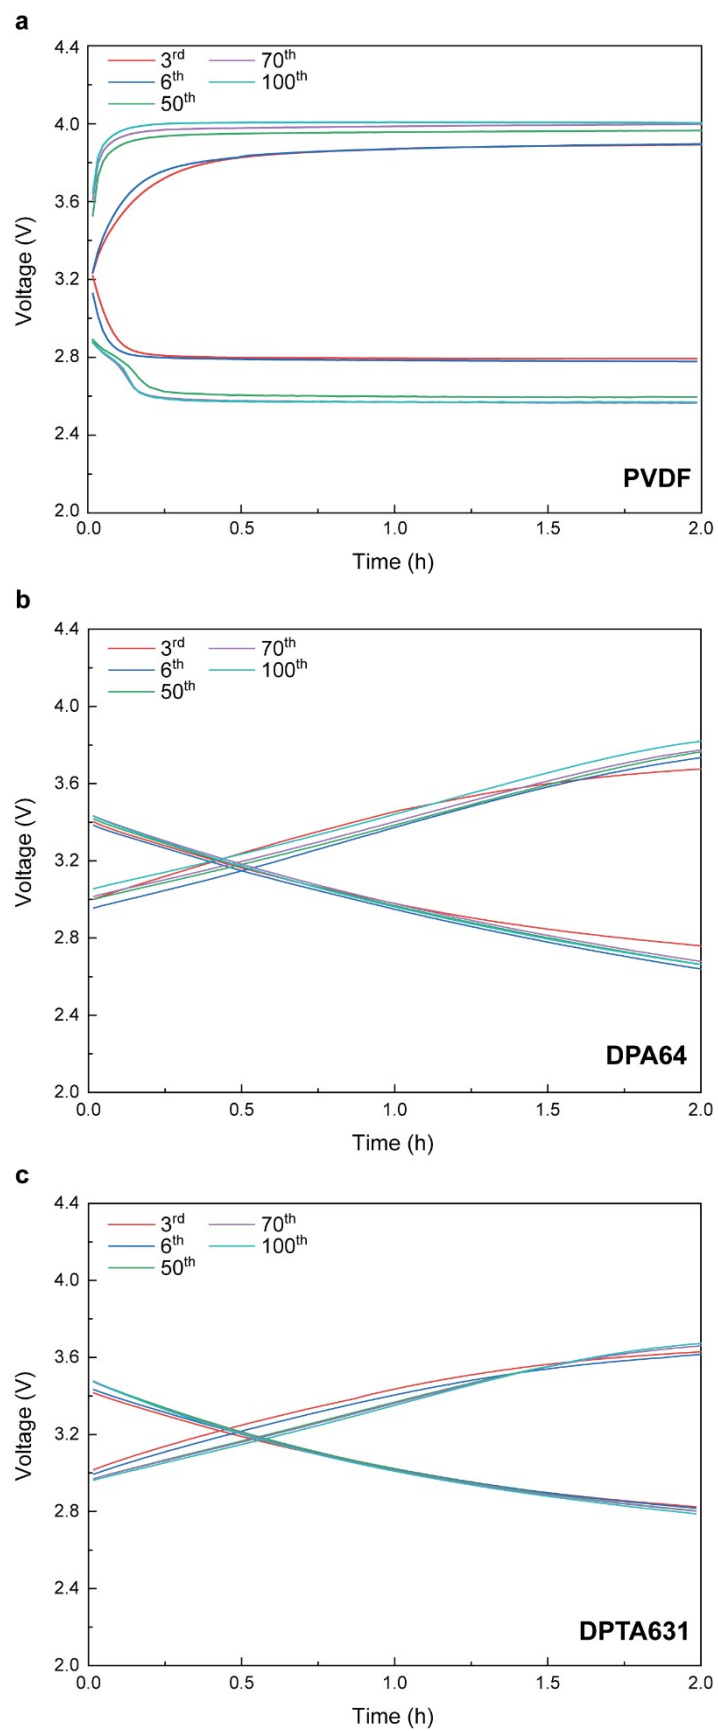

**Fig. S10.** Voltage gap of charge/discharge cycles in the polymer binders; (a) PVDF, (b) DPA64, and (c) DPTA631.

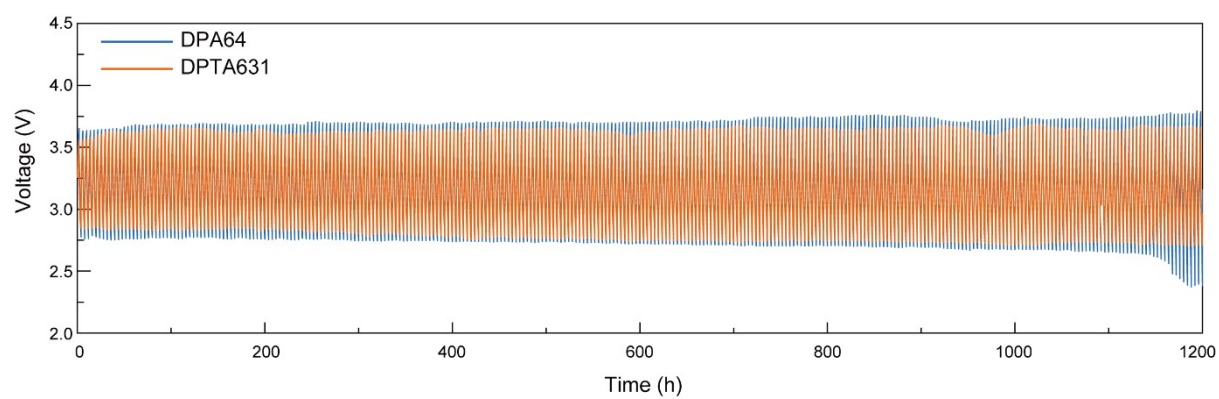

**Fig. S11.** Galvanostatic charge/discharge profiles of DPA64 and DPTA631 for 300 cycles.

**Table S2.** Average overpotential of polymer binders up to 100 cycles.

| Cycle No. | PVDF    | DPA64   | DPTA631 |
|-----------|---------|---------|---------|
| 1         | 0.45981 | 0.3827  | 0.27731 |
| 2         | 0.46086 | 0.36223 | 0.25546 |
| 3         | 0.46756 | 0.35562 | 0.2518  |
| 4         | 0.47523 | 0.36729 | 0.2379  |
| 5         | 0.48131 | 0.37852 | 0.23128 |
| 6         | 0.49713 | 0.40044 | 0.23027 |
| 7         | 0.51756 | 0.4028  | 0.23777 |
| 8         | 0.53487 | 0.41623 | 0.24518 |
| 9         | 0.54665 | 0.43073 | 0.24894 |
| 10        | 0.55302 | 0.4308  | 0.2393  |
| 11        | 0.56435 | 0.42462 | 0.23464 |
| 12        | 0.56654 | 0.42121 | 0.23754 |
| 13        | 0.5812  | 0.42844 | 0.25586 |
| 14        | 0.59451 | 0.43304 | 0.27599 |
| 15        | 0.60544 | 0.43702 | 0.27375 |
| 16        | 0.61485 | 0.43524 | 0.27176 |
| 17        | 0.62702 | 0.42826 | 0.26356 |
| 18        | 0.64411 | 0.42608 | 0.26683 |
| 19        | 0.66163 | 0.43162 | 0.27192 |
| 20        | 0.67833 | 0.44208 | 0.27474 |
| 21        | 0.68126 | 0.44088 | 0.27705 |
| 22        | 0.67729 | 0.43621 | 0.27281 |
| 23        | 0.67738 | 0.43488 | 0.26766 |
| 24        | 0.70152 | 0.435   | 0.26709 |
| 25        | 0.71328 | 0.43723 | 0.27104 |
| 26        | 0.72791 | 0.447   | 0.27657 |
| 27        | 0.74531 | 0.44906 | 0.28617 |
| 28        | 0.74168 | 0.44458 | 0.28229 |
| 29        | 0.74383 | 0.43545 | 0.27338 |
| 30        | 0.74515 | 0.43129 | 0.27744 |
| 31        | 0.75984 | 0.43325 | 0.28075 |
| 32        | 0.77601 | 0.43856 | 0.28749 |
| 33        | 0.78077 | 0.44295 | 0.29133 |
| 34        | 0.78408 | 0.43766 | 0.28697 |
| 35        | 0.78479 | 0.44008 | 0.28136 |
| 36        | 0.78005 | 0.44334 | 0.28371 |
| 37        | 0.79422 | 0.44739 | 0.29017 |
| 38        | 0.8015  | 0.45266 | 0.29565 |
| 39        | 0.8055  | 0.45295 | 0.29789 |
| 40        | 0.80888 | 0.44692 | 0.2925  |
| 41        | 0.80473 | 0.44011 | 0.28601 |
| 42        | 0.80157 | 0.43512 | 0.28837 |
| 43        | 0.82413 | 0.43477 | 0.29005 |
| 44        | 0.82578 | 0.43761 | 0.29257 |
| 45        | 0.82059 | 0.43877 | 0.29742 |
| 46        | 0.81082 | 0.43674 | 0.29685 |
| 47        | 0.80226 | 0.4467  | 0.29056 |
| 48        | 0.80016 | 0.4512  | 0.29229 |
| 49        | 0.80406 | 0.45315 | 0.29648 |
| 50        | 0.81094 | 0.45262 | 0.29746 |
| 51        | 0.81217 | 0.45433 | 0.29764 |
| 52        | 0.81594 | 0.44963 | 0.29346 |
| 53        | 0.81763 | 0.44615 | 0.29015 |
| 54        | 0.8127  | 0.45144 | 0.3007  |
| 55        | 0.82126 | 0.45393 | 0.31458 |
| 56        | 0.82907 | 0.45593 | 0.31785 |

|     |         |         |         |
|-----|---------|---------|---------|
| 57  | 0.82589 | 0.45993 | 0.32009 |
| 58  | 0.85145 | 0.45538 | 0.31541 |
| 59  | 0.86256 | 0.45805 | 0.31064 |
| 60  | 0.86178 | 0.44937 | 0.31259 |
| 61  | 0.8483  | 0.45737 | 0.31658 |
| 62  | 0.84816 | 0.47025 | 0.32172 |
| 63  | 0.87507 | 0.47214 | 0.32094 |
| 64  | 0.88556 | 0.47454 | 0.31118 |
| 65  | 0.87311 | 0.46871 | 0.3004  |
| 66  | 0.83507 | 0.46277 | 0.30379 |
| 67  | 0.8356  | 0.46435 | 0.31117 |
| 68  | 0.84305 | 0.4729  | 0.31691 |
| 69  | 0.85189 | 0.47685 | 0.31974 |
| 70  | 0.8598  | 0.47341 | 0.30956 |
| 71  | 0.85949 | 0.46843 | 0.30441 |
| 72  | 0.84949 | 0.46901 | 0.30922 |
| 73  | 0.85729 | 0.47356 | 0.31409 |
| 74  | 0.88719 | 0.47648 | 0.31999 |
| 75  | 0.90843 | 0.4869  | 0.32067 |
| 76  | 0.9141  | 0.48156 | 0.30983 |
| 77  | 0.91255 | 0.48    | 0.30685 |
| 78  | 0.91471 | 0.47756 | 0.30559 |
| 79  | 0.91808 | 0.47668 | 0.31108 |
| 80  | 0.92586 | 0.48684 | 0.31546 |
| 81  | 0.93212 | 0.48779 | 0.31827 |
| 82  | 0.92779 | 0.48835 | 0.30929 |
| 83  | 0.9044  | 0.485   | 0.30918 |
| 84  | 0.85535 | 0.47936 | 0.31782 |
| 85  | 0.84409 | 0.48113 | 0.32189 |
| 86  | 0.85129 | 0.48861 | 0.32046 |
| 87  | 0.85254 | 0.49662 | 0.31914 |
| 88  | 0.85391 | 0.49926 | 0.3168  |
| 89  | 0.85468 | 0.49245 | 0.31058 |
| 90  | 0.85277 | 0.49823 | 0.31499 |
| 91  | 0.85579 | 0.49765 | 0.32068 |
| 92  | 0.86049 | 0.50238 | 0.32163 |
| 93  | 0.85982 | 0.50664 | 0.32468 |
| 94  | 0.8614  | 0.50389 | 0.31993 |
| 95  | 0.86899 | 0.50368 | 0.31248 |
| 96  | 0.8725  | 0.50244 | 0.30847 |
| 97  | 0.88287 | 0.50595 | 0.31062 |
| 98  | 0.88984 | 0.50507 | 0.31255 |
| 99  | 0.89719 | 0.5215  | 0.31672 |
| 100 | 0.88261 | 0.52033 | 0.32791 |

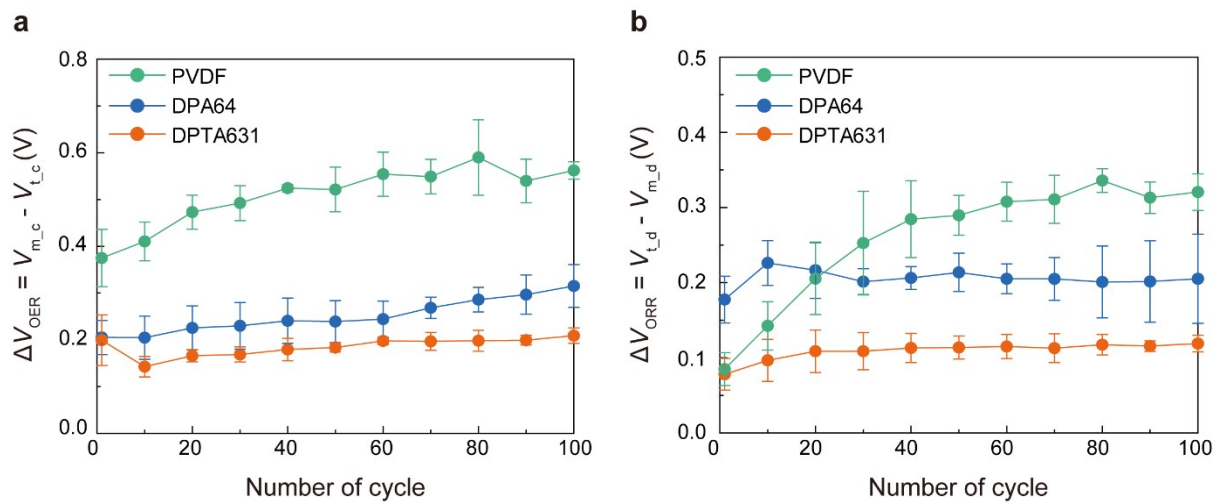

**Fig. S12.** Average and standard deviation of (a) OER and (b) ORR performance of SABs ( $n = 3$  from each independent sample and result).

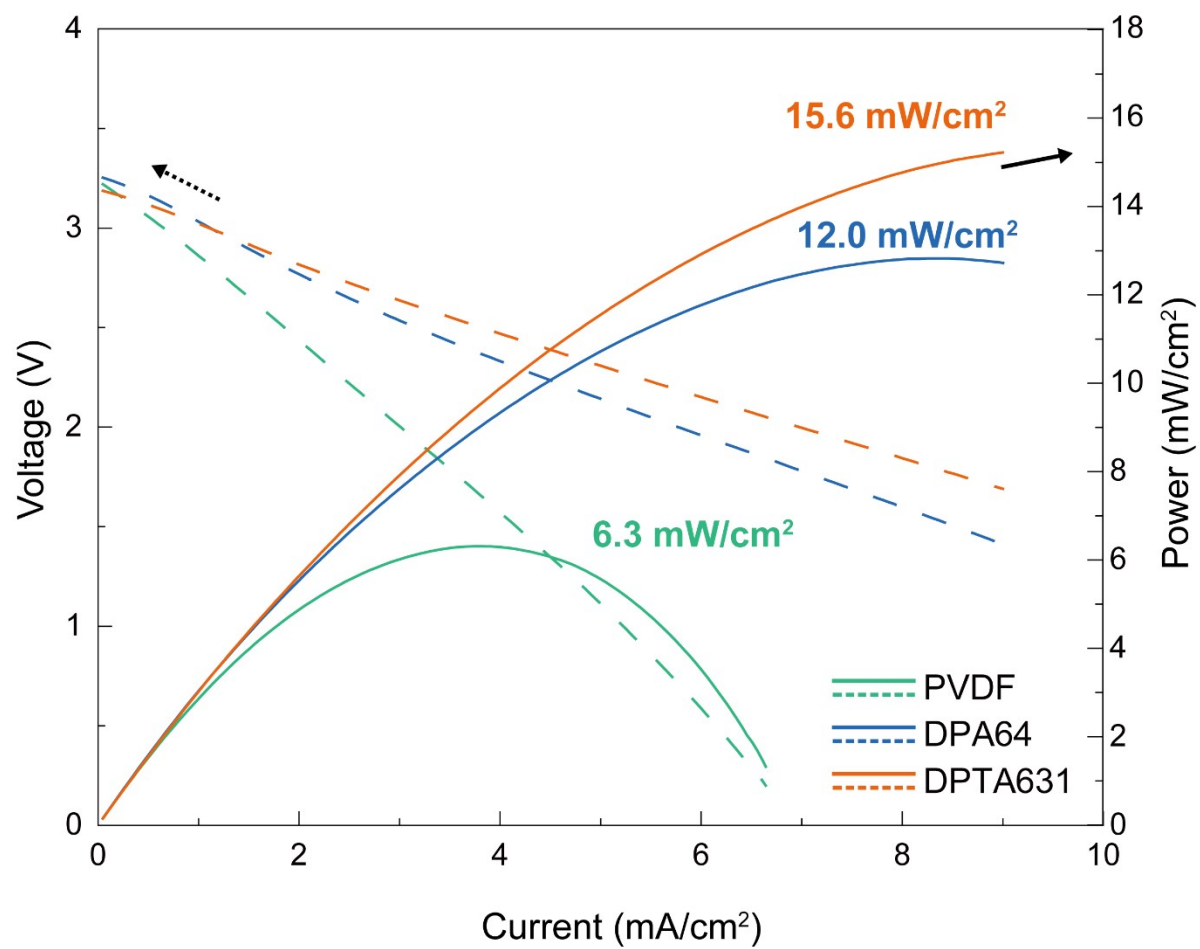

**Fig. S13.** Power density of polymer binders at 30<sup>th</sup> cycle.



**Table S3.** Simulated results for the elements of equivalent circuit.

|                    | $R_e$ ( $\Omega$ ) | $R_i$ ( $\Omega$ ) | $R_f$ ( $\Omega$ ) | $R_{ct}$ ( $\Omega$ ) |                 |            |
|--------------------|--------------------|--------------------|--------------------|-----------------------|-----------------|------------|
|                    |                    |                    |                    | initial               | After 30 cycles | Increase % |
| <b>Bare carbon</b> | 281.2              | 391.1              | 14.0               | 237.2                 | 342.0           | 44.2       |
| <b>PVDF</b>        | 280.3              | 401.7              | 20.6               | 197.4                 | 240.6           | 21.9       |
| <b>DPA64</b>       | 277.8              | 405.4              | 17.8               | 129.0                 | 144.3           | 11.8       |
| <b>DPTA631</b>     | 263.4              | 398.6              | 27.1               | 56.3                  | 60.7            | 7.8        |

$R_e$  : Resistance of two electrolytes (NaCF<sub>3</sub>SO<sub>3</sub>/TEGDME anolyte/aqueous catholyte)

$R_i$  : Grain boundary resistance of the NASICON and liquid electrolytes

$R_f$  : Resistance of the solid-electrolyte interphase later in the Na anode

$R_{ct}$  : Charge transfer resistance between carbon and titanium current collector

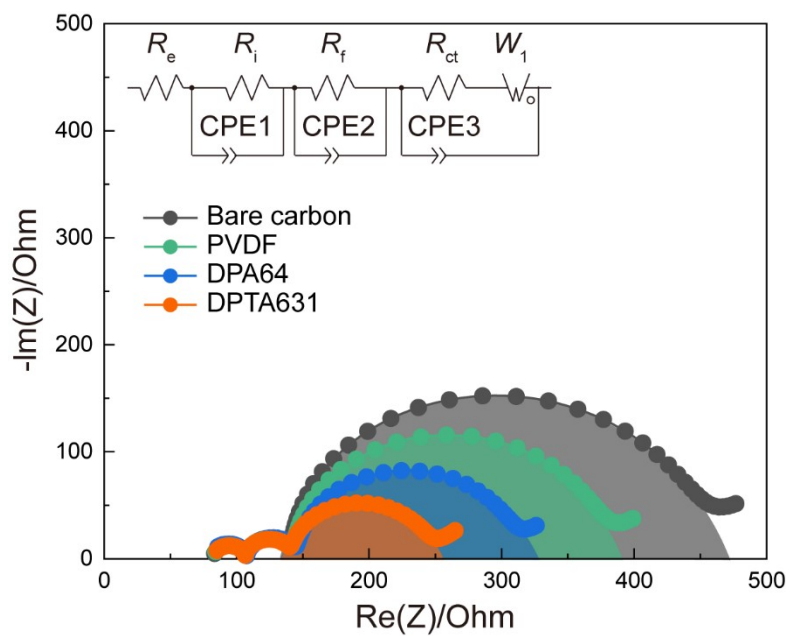

**Fig. S14.** EIS spectra and equivalent circuit of SABs assembled with Bare carbon, PVDF, DPA64 and DPTA631 after charge/discharge 30 cycles.

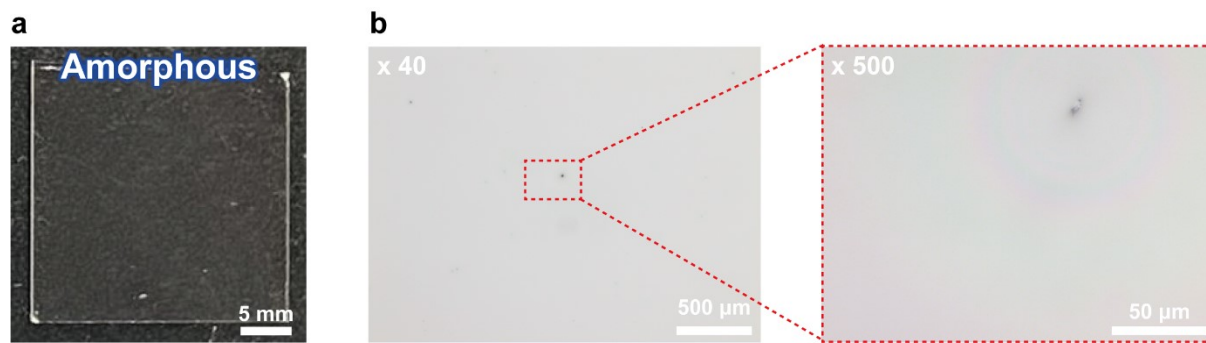

**Fig. S15.** (a) Photograph of the DPA64 coated glass and (b) POM images of the DPA64.

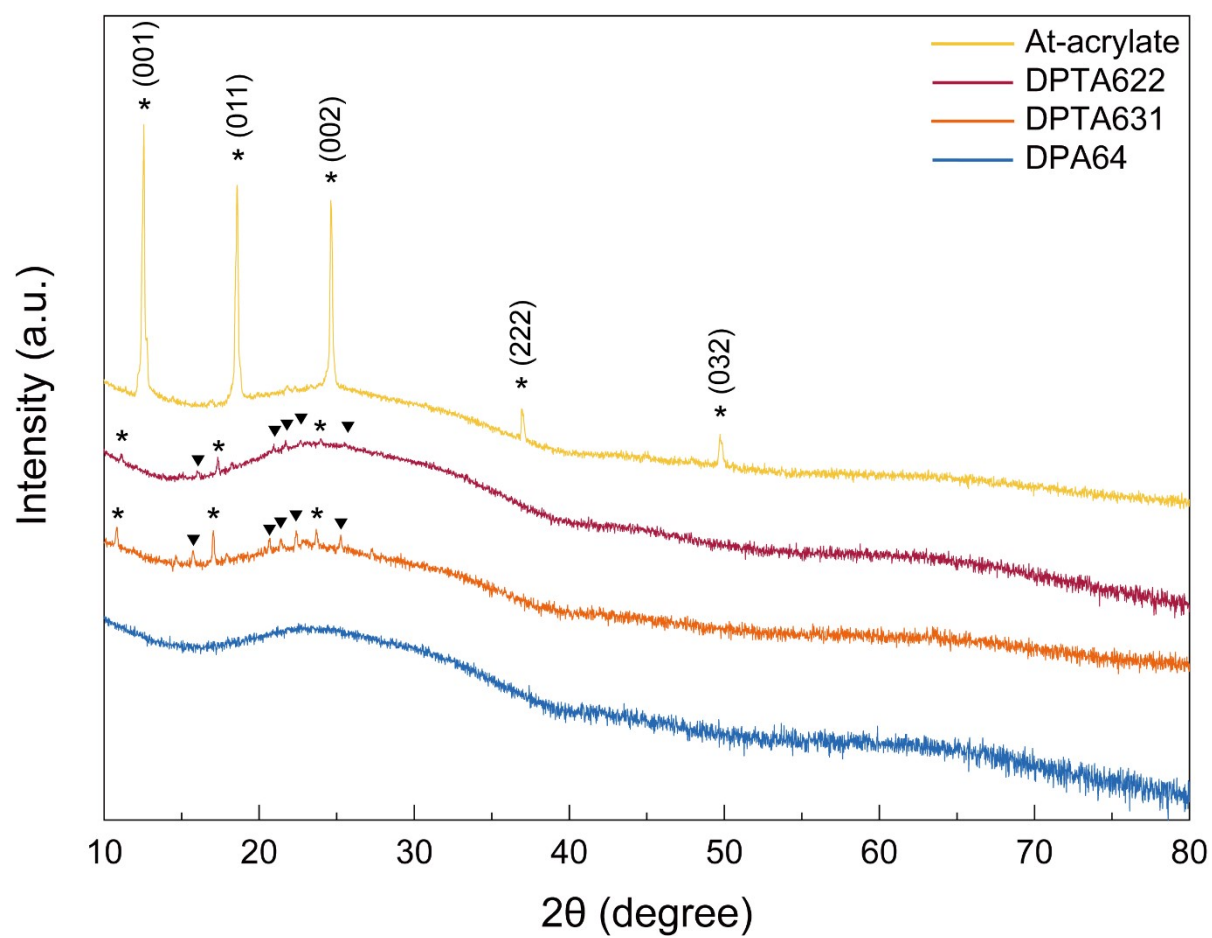

**Fig. S16.** XRD of polymer binders.

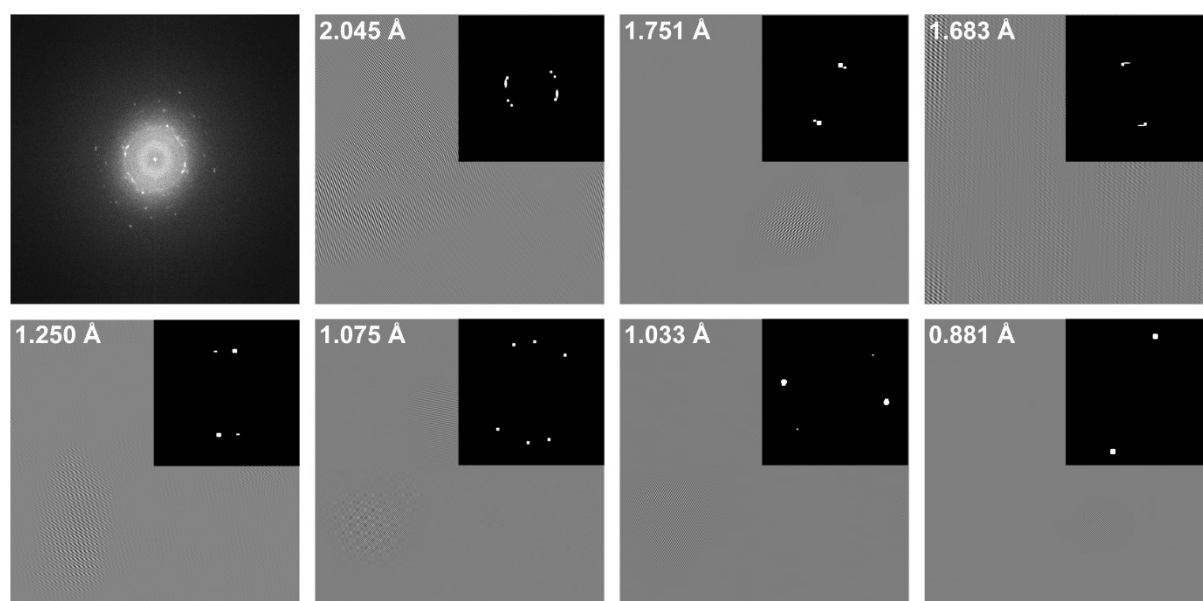

**Fig. S17.** Normal TEM image of DPTA631 and various semi-crystalline domains.

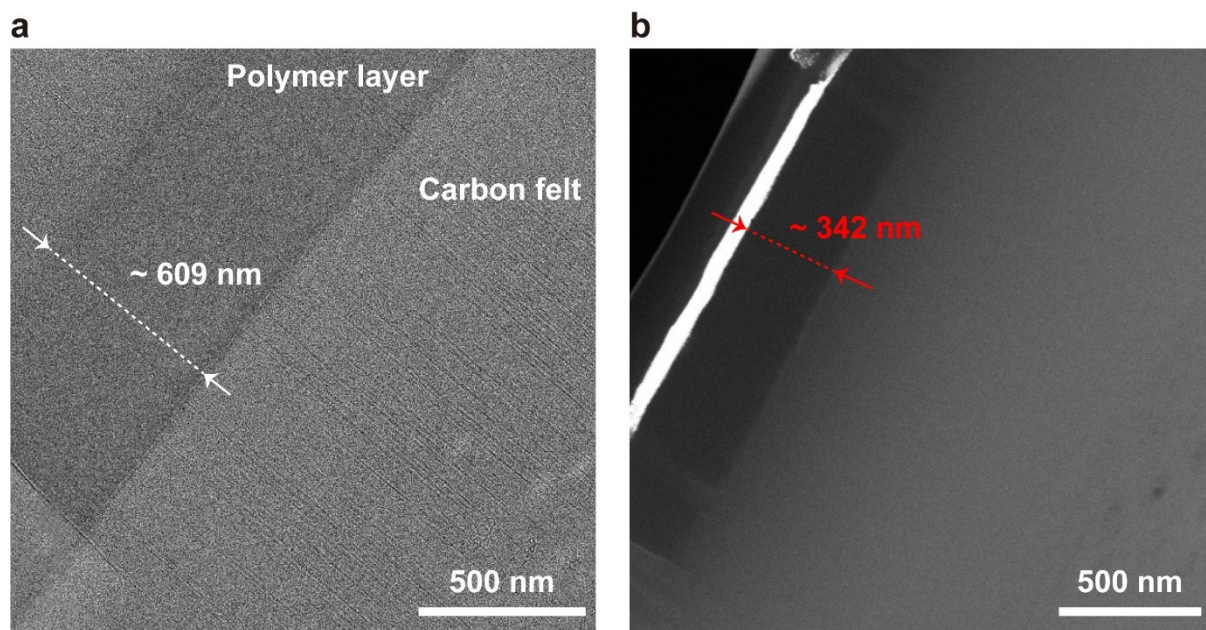

**Fig. S18.** Coating thickness of (a) DPTA631 and (b) DPA64.

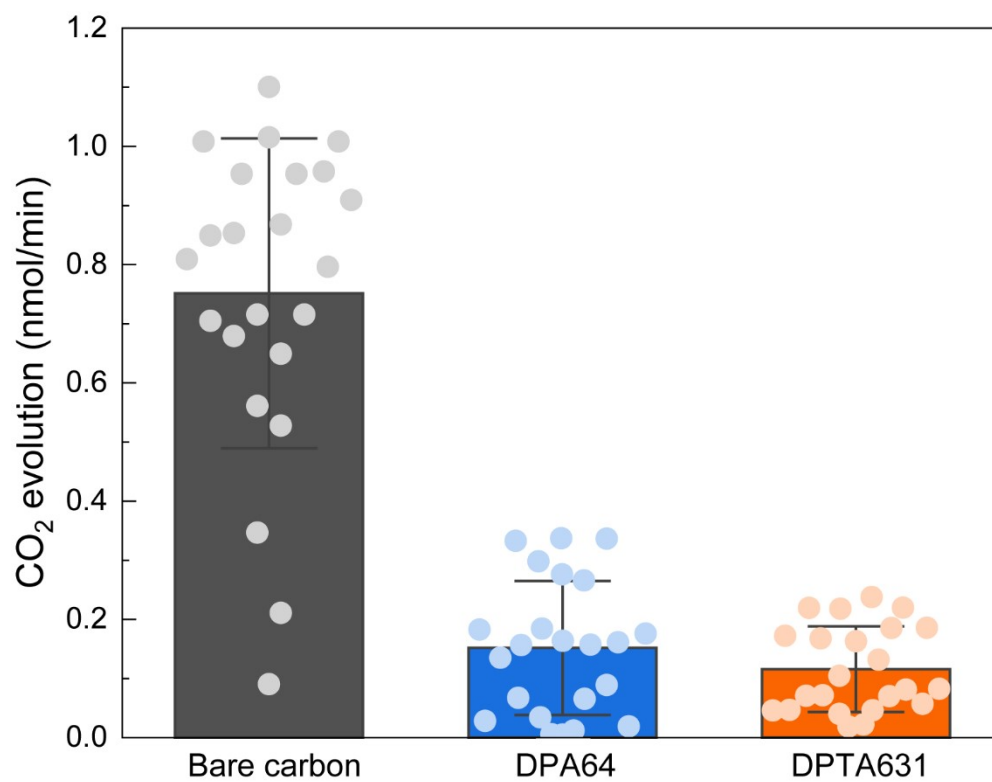

**Fig. S19.** CO<sub>2</sub> evolution rates for bare carbon, DPA64, and DPTA631. Values represent mean  $\pm$  s.d. ( $n$  = 23 from all DEMS data).

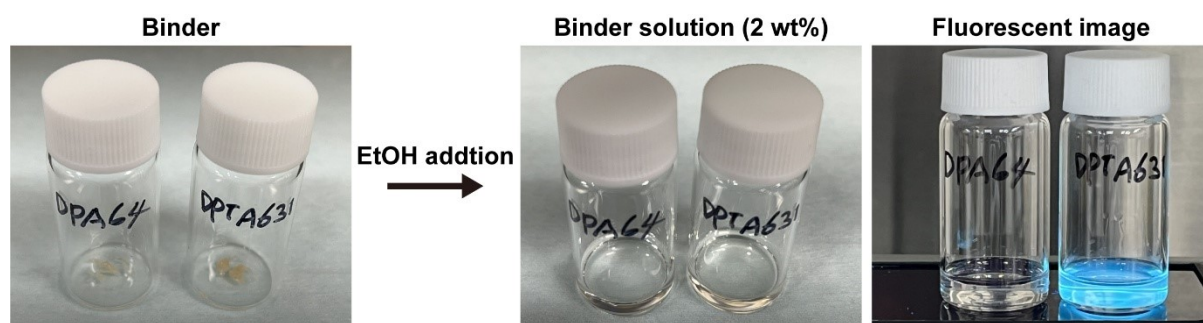

**Fig. S20.** Solubility test of binders in EtOH.



## Supplementary Reference

- [1] J. Warnant, J. Garnier, A. van Herk, P.-E. Dufils, J. Vinas, P. Lacroix-Desmazes, *Polymer Chemistry* **2013**, 4, 5656.
